# Supplementary material for: Efficacy of adjuvant cytokine-induced killer cell immunotherapy in patients with colorectal cancer after radical resection
Source: PubMed Central journal article supplement — Oncoimmunology. 2020 Apr 17;9(1):1752563. doi: 10.1080/2162402X.2020.1752563 (PMC7185208; doi:10.1080/2162402x.2020.1752563), 2020-04-17
Supplement: koni-09-01-1752563-s001.pdf [file koni-09-01-1752563-s001.pdf]

**Supplementary Table S1. Duration of chemotherapy for patients**

| <b>Control group</b> | <b>CTX regimen</b> | <b>CTX duration (weeks)</b> | <b>Reasons of withdrawing CTX</b> | <b>CIK group</b> | <b>CTX regimen</b> | <b>CTX duration (weeks)</b> | <b>Reasons of withdrawing CTX</b> |
|----------------------|--------------------|-----------------------------|-----------------------------------|------------------|--------------------|-----------------------------|-----------------------------------|
| <b>1</b>             | CAPOX              | 6                           | Refusal                           | <b>1</b>         | CAPOX              | 18                          | Completion                        |
| <b>2</b>             | CAPOX              | 18                          | Completion                        | <b>2</b>         | FOLFOX             | 4                           | Refusal                           |
| <b>3</b>             | FOLFOX             | 20                          | Completion                        | <b>3</b>         | CAPOX              | 15                          | Hand-foot syndrome                |
| <b>4</b>             | CAPOX              | 30                          | Completion                        | <b>4</b>         | CAPOX              | 24                          | Completion                        |
| <b>5</b>             | FOLFOX             | 24                          | Completion                        | <b>5</b>         | CAPOX              | 21                          | Completion                        |
| <b>6</b>             | FOLFOX             | 24                          | Completion                        | <b>6</b>         | FOLFOX             | 20                          | Refusal                           |
| <b>7</b>             | FOLFOX             | 24                          | Completion                        | <b>7</b>         | CAPOX              | 18                          | Refusal                           |
| <b>8</b>             | CAPOX              | 18                          | Completion                        | <b>8</b>         | CAPOX              | 24                          | Completion                        |
| <b>9</b>             | CAPOX              | 24                          | Completion                        | <b>9</b>         | CAPOX              | 24                          | Completion                        |
| <b>10</b>            | FOLFOX             | 24                          | Completion                        | <b>10</b>        | CAPOX              | 24                          | Completion                        |
| <b>11</b>            | FOLFOX             | 24                          | Completion                        | <b>11</b>        | FOLFOX             | 10                          | Arrhythmia                        |
| <b>12</b>            | FOLFOX             | 24                          | Completion                        | <b>12</b>        | CAPOX              | 24                          | Completion                        |
| <b>13</b>            | FOLFOX             | 20                          | Refusal                           | <b>13</b>        | CAPOX              | 24                          | Completion                        |
| <b>14</b>            | CAPOX              | 24                          | Completion                        | <b>14</b>        | CAPOX              | 24                          | Completion                        |
| <b>15</b>            | CAPOX              | 24                          | Completion                        | <b>15</b>        | CAPOX              | 24                          | Completion                        |
| <b>16</b>            | CAPOX              | 18                          | Completion                        | <b>16</b>        | Capecitabine       | 12                          | Myelosuppression                  |
| <b>17</b>            | Capecitabine       | 24                          | Completion                        | <b>17</b>        | CAPOX              | 24                          | Completion                        |
| <b>18</b>            | CAPOX              | 24                          | Completion                        | <b>18</b>        | FOLFOX             | 10                          | Gastrointestinal reaction         |
| <b>19</b>            | CAPOX              | 18                          | Refusal                           | <b>19</b>        | CAPOX              | 24                          | Completion                        |
| <b>20</b>            | FOLFOX             | 24                          | Completion                        | <b>20</b>        | CAPOX              | 24                          | Completion                        |
| <b>21</b>            | Capecitabine       | 21                          | Completion                        | <b>21</b>        | FOLFOX             | 12                          | Refusal                           |
| <b>22</b>            | CAPOX              | 18                          | Completion                        | <b>22</b>        | CAPOX              | 24                          | Completion                        |
| <b>23</b>            | FOLFOX             | 12                          | Refusal                           | <b>23</b>        | CAPOX              | 18                          | Completion                        |

---

|           |              |    |            |           |              |    |                              |
|-----------|--------------|----|------------|-----------|--------------|----|------------------------------|
| <b>24</b> | FOLFOX       | 10 | Refusal    | <b>24</b> | CAPOX        | 24 | Completion                   |
| <b>25</b> | CAPOX        | 21 | Completion | <b>25</b> | FOLFOX       | 24 | Completion                   |
| <b>26</b> | FOLFOX       | 12 | Unknown    | <b>26</b> | CAPOX        | 24 | Completion                   |
| <b>27</b> | Capecitabine | 18 | Completion | <b>27</b> | CAPOX        | 24 | Completion                   |
| <b>28</b> | FOLFOX       | 24 | Completion | <b>28</b> | CAPOX        | 24 | Completion                   |
| <b>29</b> | CAPOX        | 18 | Completion | <b>29</b> | CAPOX        | 24 | Completion                   |
| <b>30</b> | CAPOX        | 24 | Completion | <b>30</b> | CAPOX        | 24 | Completion                   |
| <b>31</b> | FOLFOX       | 24 | Completion | <b>31</b> | FOLFOX       | 20 | Completion                   |
| <b>32</b> | CAPOX        | 24 | Completion | <b>32</b> | CAPOX        | 6  | Diarrhea                     |
| <b>33</b> | CAPOX        | 6  | Unknown    | <b>33</b> | CAPOX        | 24 | completion                   |
| <b>34</b> | CAPOX        | 24 | Completion | <b>34</b> | FOLFOX       | 8  | Gastrointestinal<br>reaction |
| <b>35</b> | CAPOX        | 24 | Completion | <b>35</b> | CAPOX        | 24 | Completion                   |
| <b>36</b> | CAPOX        | 24 | Completion | <b>36</b> | CAPOX        | 18 | Gastrointestinal<br>reaction |
| <b>37</b> | FOLFOX       | 20 | Refusal    | <b>37</b> | CAPOX        | 24 | Completion                   |
| <b>38</b> | CAPOX        | 18 | Completion | <b>38</b> | CAPOX        | 24 | Completion                   |
| <b>39</b> | CAPOX        | 18 | Completion | <b>39</b> | CAPOX        | 18 | Unknown                      |
| <b>40</b> | CAPOX        | 24 | Completion | <b>40</b> | CAPOX        | 18 | Gastrointestinal<br>reaction |
| <b>41</b> | CAPOX        | 18 | Refusal    | <b>41</b> | CAPOX        | 24 | Completion                   |
| <b>42</b> | CAPOX        | 24 | Completion | <b>42</b> | CAPOX        | 24 | Completion                   |
| <b>43</b> | FOLFOX       | 22 | Completion | <b>43</b> | CAPOX        | 18 | Unknown                      |
| <b>44</b> | CAPOX        | 21 | Completion | <b>44</b> | CAPOX        | 33 | Completion                   |
| <b>45</b> | CAPOX        | 21 | Completion | <b>45</b> | Capecitabine | 24 | Completion                   |
| <b>46</b> | CAPOX        | 24 | Completion | <b>46</b> | CAPOX        | 24 | Completion                   |
| <b>47</b> | FOLFOX       | 12 | Refusal    | <b>47</b> | CAPOX        | 24 | Completion                   |
| <b>48</b> | FOLFOX       | 16 | Unknown    | <b>48</b> | FOLFOX       | 24 | Completion                   |
| <b>49</b> | CAPOX        | 24 | Completion | <b>49</b> | FOLFOX       | 24 | Completion                   |

---

|           |              |    |                              |           |              |    |                              |
|-----------|--------------|----|------------------------------|-----------|--------------|----|------------------------------|
| <b>50</b> | CAPOX        | 18 | Completion                   | <b>50</b> | CAPOX        | 18 | Myelosuppression             |
| <b>51</b> | CAPOX        | 33 | Completion                   | <b>51</b> | CAPOX        | 24 | Completion                   |
| <b>52</b> | CAPOX        | 18 | Completion                   | <b>52</b> | CAPOX        | 24 | Completion                   |
| <b>53</b> | CAPOX        | 18 | Gastrointestinal<br>reaction | <b>53</b> | CAPOX        | 24 | Completion                   |
| <b>54</b> | CAPOX        | 18 | Completion                   | <b>54</b> | FOLFOX       | 20 | Refusal                      |
| <b>55</b> | CAPOX        | 18 | Refusal                      | <b>55</b> | FOLFOX       | 24 | Completion                   |
| <b>56</b> | FOLFOX       | 24 | Completion                   | <b>56</b> | Capecitabine | 12 | Gastrointestinal<br>reaction |
| <b>57</b> | CAPOX        | 18 | Completion                   | <b>57</b> | Capecitabine | 3  | Refusal                      |
| <b>58</b> | CAPOX        | 24 | Completion                   | <b>58</b> | Capecitabine | 21 | Arrhythmia                   |
| <b>59</b> | CAPOX        | 18 | Refusal                      | <b>59</b> | CAPOX        | 24 | Completion                   |
| <b>60</b> | CAPOX        | 24 | Completion                   | <b>60</b> | Capecitabine | 24 | Completion                   |
| <b>61</b> | Capecitabine | 18 | Myelosuppression             |           |              |    |                              |
| <b>62</b> | CAPOX        | 24 | Completion                   |           |              |    |                              |

CIK, cytokine-induced killer cell. CTX, chemotherapy. CAPOX, Capecitabine + Oxaliplatin. FOLFOX, Oxaliplatin + 5-fluorouracil.

**Supplementary Table S2. The detailed information of CIK cell treatment**

| CIK group | Cycles of CIK cell treatment | Mean number                                     | Mean number                                            | DFS (months) | Recurrence | OS (months) | Survival |
|-----------|------------------------------|-------------------------------------------------|--------------------------------------------------------|--------------|------------|-------------|----------|
|           |                              | of total infused CIK cells ( $\times 10^{10}$ ) | of total infused CIK cells per Kg BW ( $\times 10^8$ ) |              |            |             |          |
| 1         | 5                            | 1.210                                           | 1.494                                                  | 124          | Yes        | 127         | Alive    |
| 2         | 6                            | 1.230                                           | 1.662                                                  | 130          | No         | 130         | Alive    |
| 3         | 20                           | 1.239                                           | 1.877                                                  | 98           | No         | 98          | Alive    |
| 4         | 23                           | 1.216                                           | 1.762                                                  | 118          | No         | 118         | Alive    |
| 5         | 7                            | 1.215                                           | 1.687                                                  | 21           | Yes        | 37          | Death    |
| 6         | 5                            | 1.230                                           | 2.278                                                  | 11           | No         | 11          | Alive    |
| 7         | 24                           | 1.225                                           | 2.150                                                  | 86           | No         | 86          | Alive    |
| 8         | 63                           | 1.208                                           | 2.415                                                  | 97           | No         | 97          | Alive    |
| 9         | 16                           | 1.240                                           | 2.479                                                  | 39           | Yes        | 56          | Death    |
| 10        | 33                           | 1.230                                           | 2.365                                                  | 88           | No         | 88          | Alive    |
| 11        | 9                            | 1.270                                           | 2.822                                                  | 11           | Yes        | 11          | Death    |
| 12        | 20                           | 1.224                                           | 1.883                                                  | 63           | No         | 63          | Alive    |
| 13        | 30                           | 1.231                                           | 1.539                                                  | 71           | No         | 71          | Alive    |
| 14        | 5                            | 1.182                                           | 2.412                                                  | 17           | Yes        | 29          | Death    |
| 15        | 5                            | 1.246                                           | 2.596                                                  | 59           | No         | 59          | Alive    |
| 16        | 10                           | 1.232                                           | 2.464                                                  | 71           | No         | 71          | Alive    |
| 17        | 11                           | 1.233                                           | 2.465                                                  | 70           | No         | 70          | Alive    |
| 18        | 18                           | 1.228                                           | 1.497                                                  | 69           | No         | 69          | Alive    |
| 19        | 54                           | 1.230                                           | 2.236                                                  | 67           | No         | 67          | Alive    |
| 20        | 35                           | 1.244                                           | 1.382                                                  | 61           | No         | 61          | Alive    |
| 21        | 8                            | 1.225                                           | 2.450                                                  | 12           | No         | 12          | Alive    |
| 22        | 9                            | 1.224                                           | 2.041                                                  | 68           | No         | 68          | Alive    |
| 23        | 15                           | 1.227                                           | 1.168                                                  | 48           | No         | 48          | Alive    |
| 24        | 46                           | 1.224                                           | 1.569                                                  | 25           | Yes        | 64          | Death    |

|           |    |       |       |    |     |    |       |
|-----------|----|-------|-------|----|-----|----|-------|
| <b>25</b> | 17 | 1.235 | 2.469 | 83 | No  | 83 | Alive |
| <b>26</b> | 17 | 1.236 | 2.208 | 65 | No  | 65 | Alive |
| <b>27</b> | 8  | 1.219 | 2.031 | 20 | Yes | 52 | Alive |
| <b>28</b> | 8  | 1.225 | 2.042 | 36 | No  | 36 | Alive |
| <b>29</b> | 8  | 1.233 | 1.896 | 60 | No  | 60 | Alive |
| <b>30</b> | 24 | 1.220 | 1.769 | 49 | No  | 49 | Alive |
| <b>31</b> | 21 | 1.209 | 2.324 | 20 | Yes | 62 | Alive |
| <b>32</b> | 29 | 1.222 | 2.221 | 35 | No  | 35 | Alive |
| <b>33</b> | 8  | 1.226 | 1.752 | 56 | No  | 56 | Alive |
| <b>34</b> | 10 | 1.200 | 1.846 | 67 | No  | 67 | Alive |
| <b>35</b> | 8  | 1.220 | 1.877 | 48 | No  | 48 | Alive |
| <b>36</b> | 11 | 1.225 | 2.111 | 72 | No  | 72 | Alive |
| <b>37</b> | 8  | 1.229 | 1.890 | 19 | Yes | 49 | Alive |
| <b>38</b> | 5  | 1.224 | 1.654 | 35 | Yes | 53 | Alive |
| <b>39</b> | 13 | 1.218 | 1.625 | 18 | Yes | 52 | Alive |
| <b>40</b> | 6  | 1.213 | 2.092 | 7  | No  | 7  | Alive |
| <b>41</b> | 10 | 1.221 | 2.261 | 37 | No  | 37 | Alive |
| <b>42</b> | 43 | 1.201 | 1.877 | 39 | Yes | 57 | Alive |
| <b>43</b> | 29 | 1.200 | 1.667 | 53 | Yes | 53 | Alive |
| <b>44</b> | 10 | 1.210 | 2.749 | 15 | Yes | 41 | Alive |
| <b>45</b> | 14 | 1.224 | 2.039 | 41 | No  | 41 | Alive |
| <b>46</b> | 8  | 1.220 | 1.848 | 45 | No  | 45 | Alive |
| <b>47</b> | 8  | 1.215 | 2.095 | 46 | No  | 46 | Alive |
| <b>48</b> | 43 | 1.198 | 2.066 | 31 | Yes | 48 | Alive |
| <b>49</b> | 27 | 1.257 | 2.733 | 56 | No  | 56 | Alive |
| <b>50</b> | 6  | 1.223 | 2.224 | 46 | No  | 46 | Alive |
| <b>51</b> | 8  | 1.225 | 1.914 | 11 | No  | 11 | Alive |
| <b>52</b> | 4  | 1.220 | 2.218 | 44 | No  | 44 | Alive |
| <b>53</b> | 8  | 1.226 | 1.703 | 39 | No  | 39 | Alive |

|           |    |       |       |    |     |    |       |
|-----------|----|-------|-------|----|-----|----|-------|
| <b>54</b> | 40 | 1.213 | 1.867 | 46 | Yes | 48 | Death |
| <b>55</b> | 10 | 1.218 | 2.100 | 52 | No  | 52 | Alive |
| <b>56</b> | 10 | 1.230 | 1.864 | 35 | No  | 35 | Alive |
| <b>57</b> | 19 | 1.198 | 2.349 | 28 | No  | 28 | Alive |
| <b>58</b> | 17 | 1.188 | 2.285 | 91 | No  | 91 | Alive |
| <b>59</b> | 22 | 1.252 | 1.605 | 32 | No  | 32 | Alive |
| <b>60</b> | 12 | 1.261 | 2.292 | 28 | No  | 28 | Alive |

---

CIK, cytokine-induced killer cell. BW, body weight. DFS, disease-free survival. OS, overall survival.

**Supplementary Table S3. The detailed survival information**

| <b>Control group</b> | <b>Duration of chemotherapy (Weeks)</b> | <b>T stage</b> | <b>DFS (months)</b> | <b>Recurrence</b> | <b>OS (months)</b> | <b>Survival</b> | <b>CIK group</b> | <b>Duration of chemotherapy (Weeks)</b> | <b>T stage</b> | <b>DFS (months)</b> | <b>Recurrence</b> | <b>OS (months)</b> | <b>Survival</b> |
|----------------------|-----------------------------------------|----------------|---------------------|-------------------|--------------------|-----------------|------------------|-----------------------------------------|----------------|---------------------|-------------------|--------------------|-----------------|
| <b>1</b>             | 6                                       | 4              | 20                  | Yes               | 51                 | Death           | <b>1</b>         | 18                                      | 3              | 124                 | Yes               | 127                | Alive           |
| <b>2</b>             | 18                                      | 4              | 28                  | Yes               | 37                 | Alive           | <b>2</b>         | 4                                       | 3              | 130                 | No                | 130                | Alive           |
| <b>3</b>             | 20                                      | 3              | 32                  | Yes               | 32                 | Alive           | <b>3</b>         | 15                                      | 4              | 98                  | No                | 98                 | Alive           |
| <b>4</b>             | 30                                      | 4              | 107                 | No                | 107                | Alive           | <b>4</b>         | 24                                      | 4              | 118                 | No                | 118                | Alive           |
| <b>5</b>             | 24                                      | 4              | 34                  | No                | 34                 | Alive           | <b>5</b>         | 21                                      | 2              | 21                  | Yes               | 37                 | Death           |
| <b>6</b>             | 24                                      | 3              | 86                  | No                | 86                 | Alive           | <b>6</b>         | 20                                      | 3              | 11                  | No                | 11                 | Alive           |
| <b>7</b>             | 24                                      | 1              | 45                  | No                | 45                 | Alive           | <b>7</b>         | 18                                      | 4              | 86                  | No                | 86                 | Alive           |
| <b>8</b>             | 18                                      | 4              | 31                  | Yes               | 105                | Alive           | <b>8</b>         | 24                                      | 4              | 97                  | No                | 97                 | Alive           |
| <b>9</b>             | 24                                      | 4              | 25                  | Yes               | 37                 | Death           | <b>9</b>         | 24                                      | 3              | 39                  | Yes               | 56                 | Death           |
| <b>10</b>            | 24                                      | 3              | 3                   | Yes               | 13                 | Alive           | <b>10</b>        | 24                                      | 4              | 88                  | No                | 88                 | Alive           |
| <b>11</b>            | 24                                      | 3              | 13                  | Yes               | 30                 | Death           | <b>11</b>        | 10                                      | 4              | 11                  | Yes               | 11                 | Death           |
| <b>12</b>            | 24                                      | 2              | 102                 | No                | 102                | Alive           | <b>12</b>        | 24                                      | 4              | 63                  | No                | 63                 | Alive           |
| <b>13</b>            | 20                                      | 3              | 88                  | No                | 88                 | Alive           | <b>13</b>        | 24                                      | 3              | 71                  | No                | 71                 | Alive           |

|           |    |   |     |     |     |       |           |    |   |    |     |    |       |
|-----------|----|---|-----|-----|-----|-------|-----------|----|---|----|-----|----|-------|
| <b>14</b> | 24 | 3 | 103 | No  | 103 | Alive | <b>14</b> | 24 | 3 | 17 | Yes | 29 | Death |
| <b>15</b> | 24 | 2 | 114 | No  | 114 | Alive | <b>15</b> | 24 | 3 | 59 | No  | 59 | Alive |
| <b>16</b> | 18 | 4 | 15  | Yes | 66  | Death | <b>16</b> | 12 | 4 | 71 | No  | 71 | Alive |
| <b>17</b> | 24 | 3 | 99  | No  | 99  | Alive | <b>17</b> | 24 | 4 | 70 | No  | 70 | Alive |
| <b>18</b> | 24 | 3 | 93  | No  | 93  | Alive | <b>18</b> | 10 | 3 | 69 | No  | 69 | Alive |
| <b>19</b> | 18 | 3 | 72  | No  | 72  | Alive | <b>19</b> | 24 | 3 | 67 | No  | 67 | Alive |
| <b>20</b> | 24 | 4 | 18  | Yes | 22  | Alive | <b>20</b> | 24 | 2 | 61 | No  | 61 | Alive |
| <b>21</b> | 21 | 4 | 11  | Yes | 27  | Death | <b>21</b> | 12 | 4 | 12 | No  | 12 | Alive |
| <b>22</b> | 18 | 3 | 13  | Yes | 57  | Alive | <b>22</b> | 24 | 3 | 68 | No  | 68 | Alive |
| <b>23</b> | 12 | 4 | 13  | Yes | 39  | Death | <b>23</b> | 18 | 3 | 48 | No  | 48 | Alive |
| <b>24</b> | 10 | 3 | 40  | Yes | 87  | Death | <b>24</b> | 24 | 3 | 25 | Yes | 64 | Death |
| <b>25</b> | 21 | 4 | 6   | Yes | 9   | Death | <b>25</b> | 24 | 3 | 83 | No  | 83 | Alive |
| <b>26</b> | 12 | 4 | 24  | Yes | 62  | Death | <b>26</b> | 24 | 4 | 65 | No  | 65 | Alive |
| <b>27</b> | 18 | 3 | 81  | No  | 81  | Alive | <b>27</b> | 24 | 3 | 20 | Yes | 52 | Alive |
| <b>28</b> | 24 | 4 | 30  | No  | 30  | Alive | <b>28</b> | 24 | 3 | 36 | No  | 36 | Alive |
| <b>29</b> | 18 | 3 | 54  | No  | 54  | Alive | <b>29</b> | 24 | 4 | 60 | No  | 60 | Alive |
| <b>30</b> | 24 | 4 | 12  | Yes | 64  | Alive | <b>30</b> | 24 | 3 | 49 | No  | 49 | Alive |



|           |    |   |    |     |    |       |           |    |   |    |     |    |       |
|-----------|----|---|----|-----|----|-------|-----------|----|---|----|-----|----|-------|
| <b>31</b> | 24 | 4 | 38 | Yes | 40 | Alive | <b>31</b> | 20 | 3 | 20 | Yes | 62 | Alive |
| <b>32</b> | 24 | 4 | 51 | No  | 51 | Alive | <b>32</b> | 6  | 2 | 35 | No  | 35 | Alive |
| <b>33</b> | 6  | 3 | 36 | No  | 36 | Alive | <b>33</b> | 24 | 2 | 56 | No  | 56 | Alive |
| <b>34</b> | 24 | 3 | 80 | No  | 80 | Alive | <b>34</b> | 8  | 4 | 67 | No  | 67 | Alive |
| <b>35</b> | 24 | 4 | 54 | No  | 54 | Alive | <b>35</b> | 24 | 4 | 48 | No  | 48 | Alive |
| <b>36</b> | 24 | 3 | 77 | No  | 77 | Alive | <b>36</b> | 18 | 3 | 72 | No  | 72 | Alive |
| <b>37</b> | 20 | 3 | 22 | Yes | 69 | Alive | <b>37</b> | 24 | 4 | 19 | Yes | 49 | Alive |
| <b>38</b> | 18 | 4 | 58 | No  | 58 | Alive | <b>38</b> | 24 | 3 | 35 | Yes | 53 | Alive |
| <b>39</b> | 18 | 3 | 25 | No  | 25 | Alive | <b>39</b> | 18 | 4 | 18 | Yes | 52 | Alive |
| <b>40</b> | 24 | 4 | 15 | Yes | 22 | Alive | <b>40</b> | 18 | 3 | 7  | No  | 7  | Alive |
| <b>41</b> | 18 | 3 | 10 | Yes | 20 | Death | <b>41</b> | 24 | 4 | 37 | No  | 37 | Alive |
| <b>42</b> | 24 | 3 | 54 | No  | 54 | Alive | <b>42</b> | 24 | 3 | 39 | Yes | 57 | Alive |
| <b>43</b> | 22 | 4 | 48 | No  | 48 | Alive | <b>43</b> | 18 | 4 | 53 | Yes | 53 | Alive |
| <b>44</b> | 21 | 4 | 13 | Yes | 25 | Alive | <b>44</b> | 33 | 4 | 15 | Yes | 41 | Alive |
| <b>45</b> | 21 | 4 | 12 | Yes | 17 | Death | <b>45</b> | 24 | 3 | 41 | No  | 41 | Alive |
| <b>46</b> | 24 | 3 | 14 | Yes | 36 | Death | <b>46</b> | 24 | 4 | 45 | No  | 45 | Alive |
| <b>47</b> | 12 | 3 | 24 | Yes | 30 | Death | <b>47</b> | 24 | 3 | 46 | No  | 46 | Alive |

|           |    |   |    |     |    |       |           |    |   |    |     |    |       |
|-----------|----|---|----|-----|----|-------|-----------|----|---|----|-----|----|-------|
| <b>48</b> | 16 | 3 | 9  | Yes | 27 | Death | <b>48</b> | 24 | 3 | 31 | Yes | 48 | Alive |
| <b>49</b> | 24 | 3 | 51 | No  | 51 | Alive | <b>49</b> | 24 | 4 | 56 | No  | 56 | Alive |
| <b>50</b> | 18 | 4 | 17 | Yes | 46 | Death | <b>50</b> | 18 | 3 | 46 | No  | 46 | Alive |
| <b>51</b> | 33 | 4 | 32 | Yes | 56 | Alive | <b>51</b> | 24 | 3 | 11 | No  | 11 | Alive |
| <b>52</b> | 18 | 4 | 13 | Yes | 62 | Death | <b>52</b> | 24 | 3 | 44 | No  | 44 | Alive |
| <b>53</b> | 18 | 3 | 8  | Yes | 21 | Death | <b>53</b> | 24 | 3 | 39 | No  | 39 | Alive |
| <b>54</b> | 18 | 4 | 10 | Yes | 48 | Death | <b>54</b> | 20 | 4 | 46 | Yes | 48 | Death |
| <b>55</b> | 18 | 3 | 19 | Yes | 30 | Alive | <b>55</b> | 24 | 3 | 52 | No  | 52 | Alive |
| <b>56</b> | 24 | 3 | 46 | No  | 46 | Alive | <b>56</b> | 12 | 3 | 35 | No  | 35 | Alive |
| <b>57</b> | 18 | 3 | 51 | No  | 51 | Alive | <b>57</b> | 3  | 3 | 28 | No  | 28 | Alive |
| <b>58</b> | 24 | 4 | 37 | No  | 37 | Alive | <b>58</b> | 21 | 2 | 91 | No  | 91 | Alive |
| <b>59</b> | 18 | 3 | 41 | No  | 41 | Alive | <b>59</b> | 24 | 3 | 32 | No  | 32 | Alive |
| <b>60</b> | 24 | 3 | 35 | No  | 35 | Alive | <b>60</b> | 24 | 3 | 28 | No  | 28 | Alive |
| <b>61</b> | 18 | 3 | 14 | No  | 14 | Alive |           |    |   |    |     |    |       |
| <b>62</b> | 24 | 3 | 38 | No  | 38 | Alive |           |    |   |    |     |    |       |

---

DFS, disease-free survival. OS, overall survival.

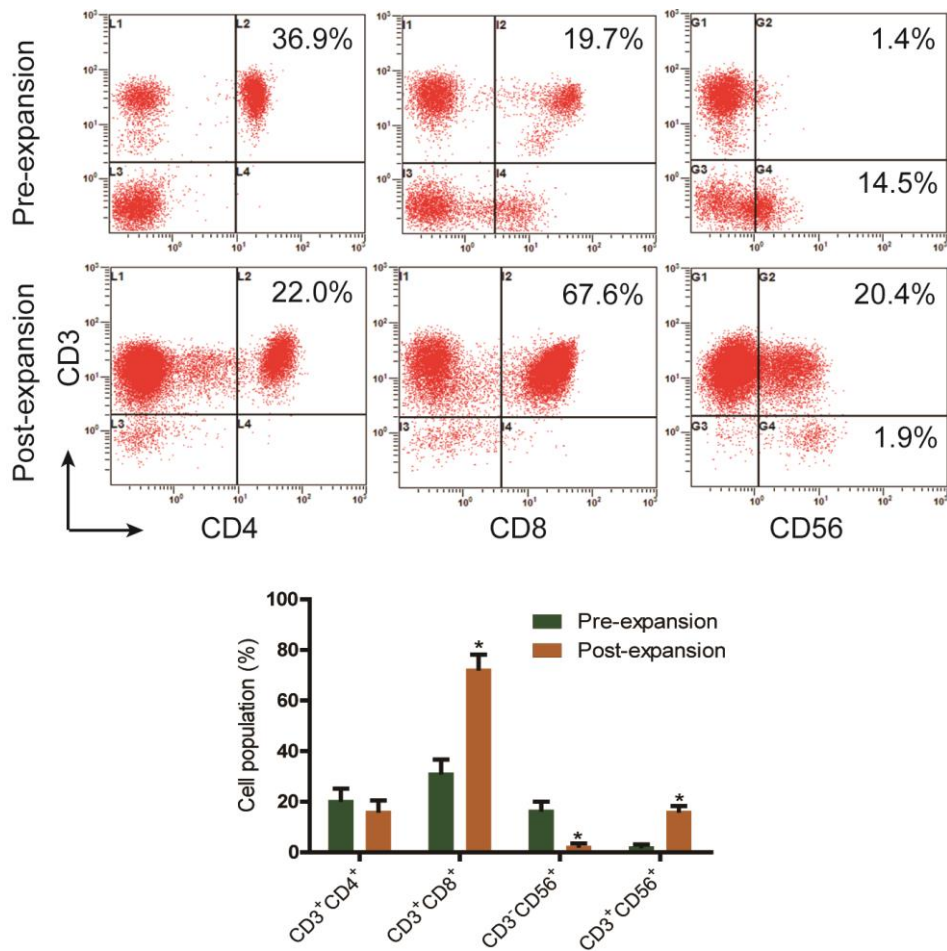

**Supplementary Figure S1. The phenotype of CIK cells before and after *in vitro* expansion.** The positive proportions of CD3<sup>+</sup>CD4<sup>+</sup>, CD3<sup>+</sup>CD8<sup>+</sup>, CD3<sup>-</sup>CD56<sup>+</sup>, and CD3<sup>+</sup>CD56<sup>+</sup> are shown (Upper). The results were from 5 patients and are represented as mean ± SEM (Lower). CIK, cytokine-induced killer cell. \**p* < 0.05.

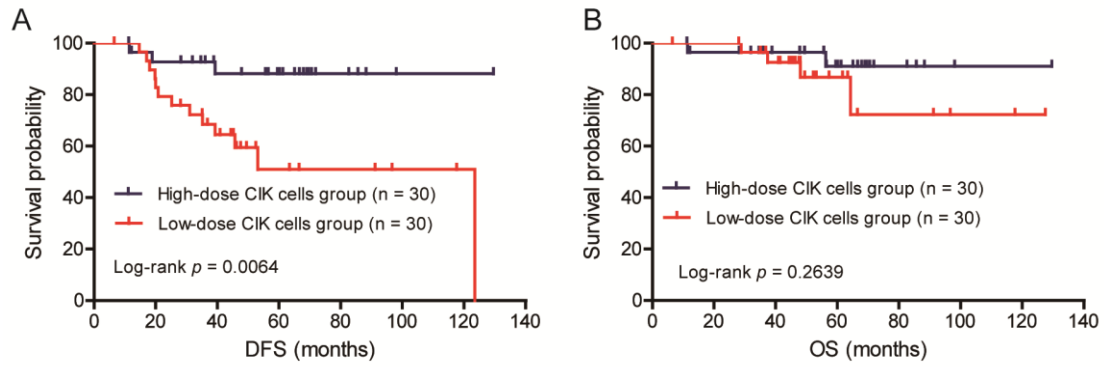

**Supplementary Figure S2. Relationship between infused cell dose and patients' prognosis.** Based on the median of mean number of total infused CIK cells, patients were divided into high-dose CIK group and low-dose CIK group. CIK, cytokine-induced killer cell.

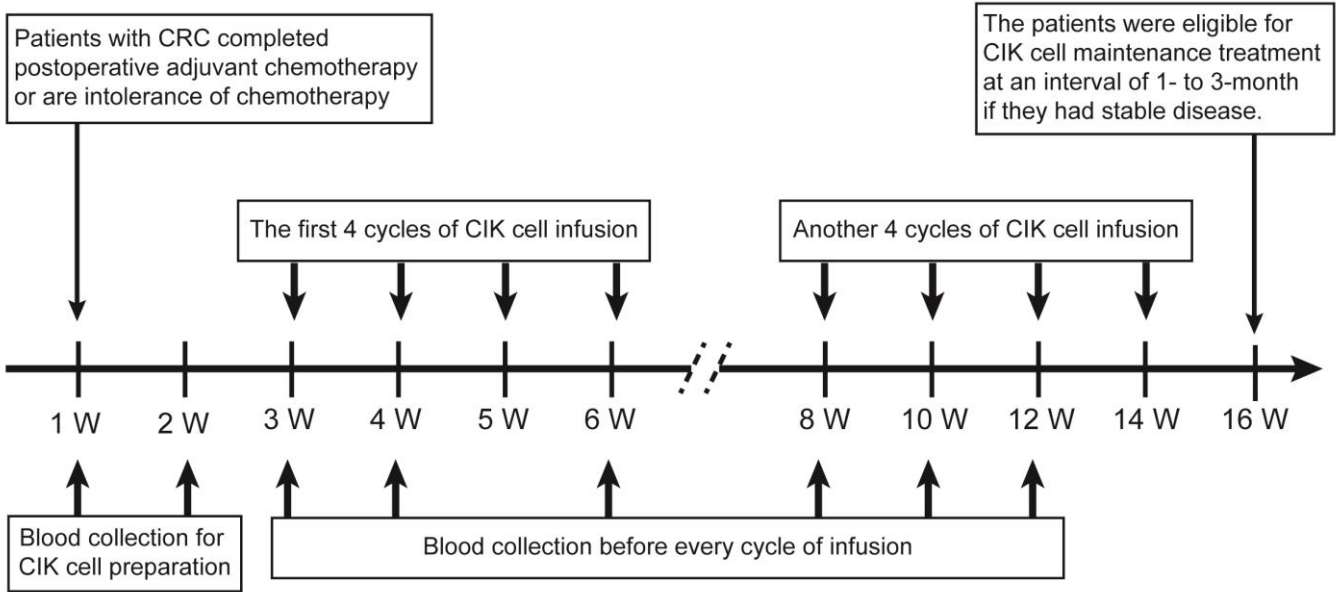

**Supplementary Figure S3. CIK cell treatment protocol.** CIK, cytokine-induced killer cells; CRC, colorectal cancer; W, week.
